# Supplementary material
Source: PubMed Central journal article supplement (PMC5946059)

Supplemental Figure 2: Inter-rater agreement on descriptors from the first modification of the NEPTUNE Digital Pathology Scoring System (NDPSS1) as estimated by the intraclass correlation coefficient (ICC) for ordinal (probabilities of presence) and all dichotomized versions of classes, subclasses, and individual descriptors. Prevalence (Prev) of each descriptor is also listed to aid interpretation. GBM: glomerular basement membrane.

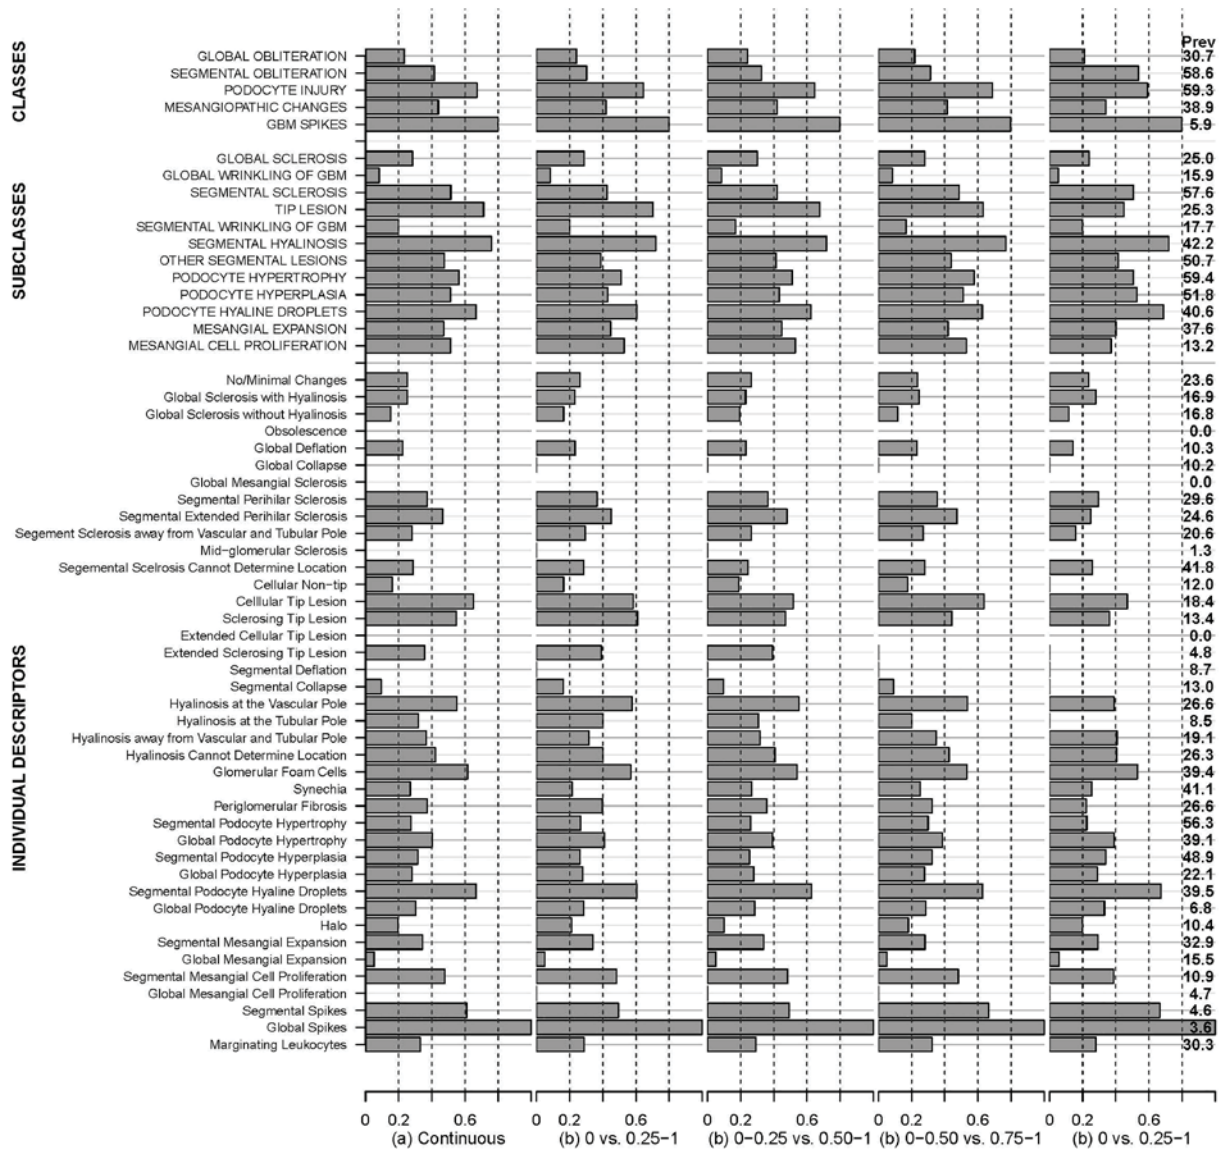

Supplement: NIHMS957480-supplement-figure_2.pdf [file NIHMS957480-supplement-figure_2.pdf]
