# Supplementary material
Source: PubMed Central journal article supplement (PMC5946059)

Supplemental Figure 3: Inter-rater agreement on subclasses of descriptors from the first modification of the NEPTUNE Digital Pathology Scoring System (NDPSS1) scored as a percentage of the glomerulus involved by any of the component descriptors (see Table 1).

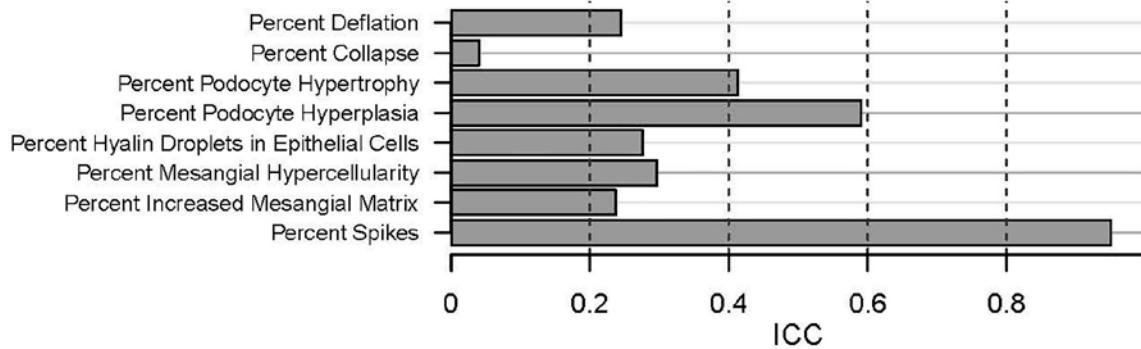

Supplemental Figure 4: Inter-rater agreement on subclasses of descriptors from the second modification of the NEPTUNE Digital Pathology Scoring System (NDPSS2) scored as the percentage of the glomerulus involved by any of the component descriptors (see Table 1). GBM: glomerular basement membrane.

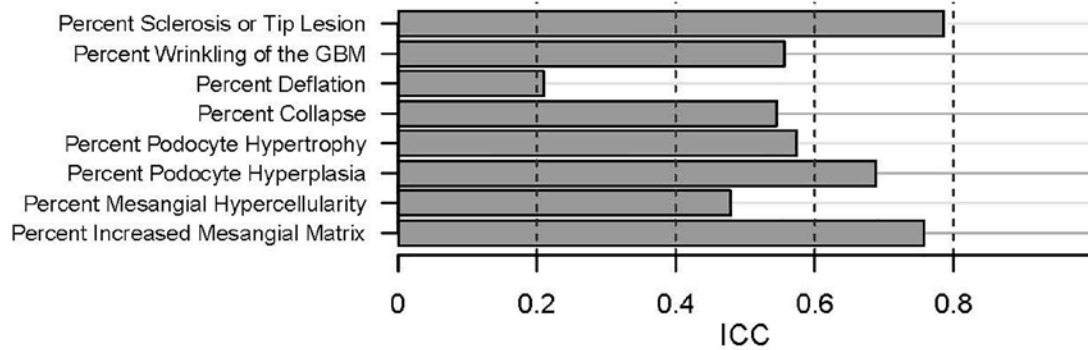

Supplement: NIHMS957480-supplement-figure_3_and_4.pdf [file NIHMS957480-supplement-figure_3_and_4.pdf]
